# Supplementary material for: Prevalence of Delirium After Abdominal Surgery and Association With Ketamine: A Retrospective, Propensity-Matched Cohort Study
Source: PubMed Central journal article supplement — Crit Care Explor. 2024 Jan 11;6(1):e1032. doi: 10.1097/CCE.0000000000001032 (PMC10786598; doi:10.1097/cce.0000000000001032), 2024-01-11
Supplement: cc9-6-e1032-s001.pdf [file cc9-6-e1032-s001.pdf]

eTable 1: Association of ketamine use with the outcomes after propensity score matching by age group

| Outcomes                                   | Age≤60                  |                     |                                          |                | Age>60                  |                     |                                          |                  |
|--------------------------------------------|-------------------------|---------------------|------------------------------------------|----------------|-------------------------|---------------------|------------------------------------------|------------------|
|                                            | Descriptive             |                     | Model (Ketamine use Vs. no-Ketamine use) |                | Descriptive             |                     | Model (Ketamine use Vs. no-Ketamine use) |                  |
|                                            | No-Ketamine use (N=109) | Ketamine use (N=42) | OR <sup>a</sup> (95%CI)                  | p-value        | No-Ketamine use (N=194) | Ketamine use (N=62) | OR <sup>a</sup> (95%CI)                  | p-value          |
| <b>Delirium</b>                            |                         |                     | 0.36 (0.13, 0.95)                        | <b>0.039</b>   |                         |                     | 0.62 (0.32, 1.21)                        | 0.162            |
| Absent                                     | 48 (44.04)              | 22 (52.38)          |                                          |                | 76 (39.18)              | 33 (53.23)          |                                          |                  |
| Present                                    | 61 (55.96)              | 20 (47.62)          |                                          |                | 118 (60.82)             | 29 (46.77)          |                                          |                  |
| <b>Mortality</b>                           |                         |                     | 2.26 (0.60, 8.57)                        | 0.230          |                         |                     | 0.93 (0.33, 2.64)                        | 0.895            |
| 170 (87.63)                                | 102 (93.58)             | 37 (88.10)          |                                          |                | 170 (87.63)             | 54 (87.10)          |                                          |                  |
| Yes                                        | 7 (6.42)                | 5 (11.90)           |                                          |                | 24 (12.37)              | 8 (12.90)           |                                          |                  |
|                                            |                         |                     | <b>Coefficient<sup>b</sup> (95%CI)</b>   | <b>p-value</b> |                         |                     | <b>Coefficient<sup>b</sup> (95%CI)</b>   | <b>p-value</b>   |
| <b>Mean pain scores</b>                    | N=109                   | N=36                |                                          |                | N=193                   | N=46                |                                          |                  |
|                                            | 2.67±2.18               | 3.28±2.56           | 0.61 (-0.42, 1.65)                       | 0.243          | 1.96±2.00               | 3.80±3.09           | 1.84 (0.87, 2.81)                        | <b>&lt;0.001</b> |
| <b>Mean opioid Use (MME)</b>               | N=97                    | N=20                |                                          |                | N=153                   | N=37                |                                          |                  |
|                                            | 11.46±5.49              | 12.44±7.20          | 0.98 (-2.51, 4.48)                       | 0.576          | 11.50±7.22              | 10.66±7.33          | -0.84 (-3.38, 1.71)                      | 0.515            |
| <b>Postoperative length of stay (days)</b> |                         |                     | 2.95 (-2.40, 8.30)                       | 0.275          |                         |                     | 2.19 (-0.96, 5.34)                       | 0.170            |
|                                            | 8.76±11.76              | 11.71±17.99         |                                          |                | 6.57±9.54               | 8.76±11.89          |                                          |                  |

OR = odds ratio. Data were presented as mean ± SD for continuous variables and number (%) for categorical variables below descriptive.

<sup>a</sup> Conditional logistic regression and <sup>b</sup> linear regression with clustering were used after propensity score matching.

Morphine Milligram Equivalent, MME. Critical-Care Pain Observation Tool, CPOT.
